# Supplementary material
Source: PubMed Central journal article supplement (PMC2831293)
Supplement: NIHMS165383-supplement-Supp_Info.pdf [file NIHMS165383-supplement-Supp_Info.pdf]

1 **Supporting information**

2

3 **BosR (BB0647) governs virulence expression in *Borrelia burgdorferi***

4 Zhiming Ouyang,<sup>1</sup> Manish Kumar,<sup>2</sup> Toru Kariu,<sup>2</sup> Shayma Haq,<sup>1</sup> Martin Goldberg,<sup>1</sup> Utpal  
5 Pal,<sup>2</sup> and Michael V. Norgard<sup>1\*</sup>

6 <sup>1</sup>Department of Microbiology, University of Texas Southwestern Medical Center, Dallas,  
7 TX 75390; <sup>2</sup>Department of Veterinary Medicine, University of Maryland, College Park,  
8 MD 20742

9

10 \*Corresponding author:

11 Michael V. Norgard

12 Department of Microbiology, University of Texas Southwestern Medical Center, 6000  
13 Harry Hines Blvd., Dallas, TX, 75390-9048

14 Email: michael.norgard@utsouthwestern.edu

15 Phone: 214-648-5900

16 Fax: 214-648-5905

17

18 Running title: *Borrelia burgdorferi* BosR

19 **Figure Legends**

20 Fig. S1. Expression of BB0648 and BB0646 in *Bb* isolates. Lane 1, WT B31; lane 2,  
21 *bosR*<sup>-</sup> OY10/D12; lane 3, mutant OY10/H3; lane 4, *bosR*<sup>+/-</sup> OY34/E6; lane 5, *bosR*<sup>+/-</sup>  
22 OY34/C4; lane 6, RNA only (no RT) used as the template (negative control); lane 7,  
23 genomic DNA only used as the template (positive control).

24

25 Fig. S2. Assessment of the plasmid contents of *Bb* parental strain B31 and the *bosR*  
26 mutant clone OY10/H3 via PCR amplification. Each plasmid for detection is designated  
27 above each gel lane. DNA size standards (M) are indicated at the left in base pairs.

28

29 Fig. S3. *In vitro* growth of *bosR* mutants. *Bb* was inoculated into BSK-II medium at 1000  
30 spirochetes/ml. Spirochetes were enumerated using dark-field microscopy. Values are the  
31 means from three independent experiments. Error bars indicate standard deviations (*n* =  
32 3). *Bb* strain designations are: WT B31; *bosR* mutants OY10/D12 and OY10/H3;  
33 complemented strains OY34/E6 and OY34/C4.

34

35 Fig. S4. BosR is not required by *Bb* to survive in unfed ticks. Unfed *Ixodes scapularis*  
36 nymphs were microinjected with various *Bb* strains. After 4 days, nymphs were dissected  
37 and the tick midguts were subjected to immunofluorescence assays with FITC-labeled  
38 anti-*Bb* antibody and examined using confocal immunofluorescence microscopy.  
39 Spirochete morphology is evident from tissues of ticks infected with WT B31, the *bosR*

40 mutant (*bosR*<sup>-</sup>), or the complemented strain (*bosR*<sup>+/-</sup>). Two independent tests were  
41 performed and representative confocal images are shown.

42 Fig. S5. Correlation between microarray and qRT-PCR data. Log-transformed fold  
43 changes for 19 differentially expressed genes were compared between wild type B31 and  
44 the *bosR* mutant.

45

46 Fig. S6. Expression of Rrp2, RpoN, and RpoS in *Bb* isolates examined using RT-PCR.

47 Lane designations are same as in Fig. S1.

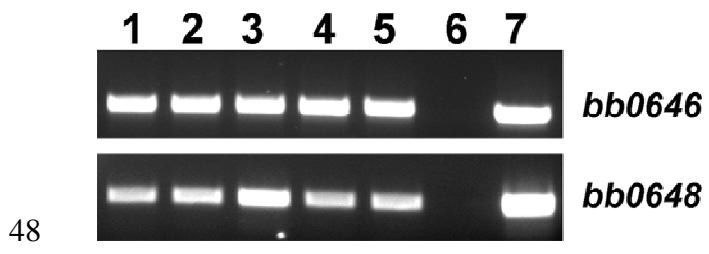

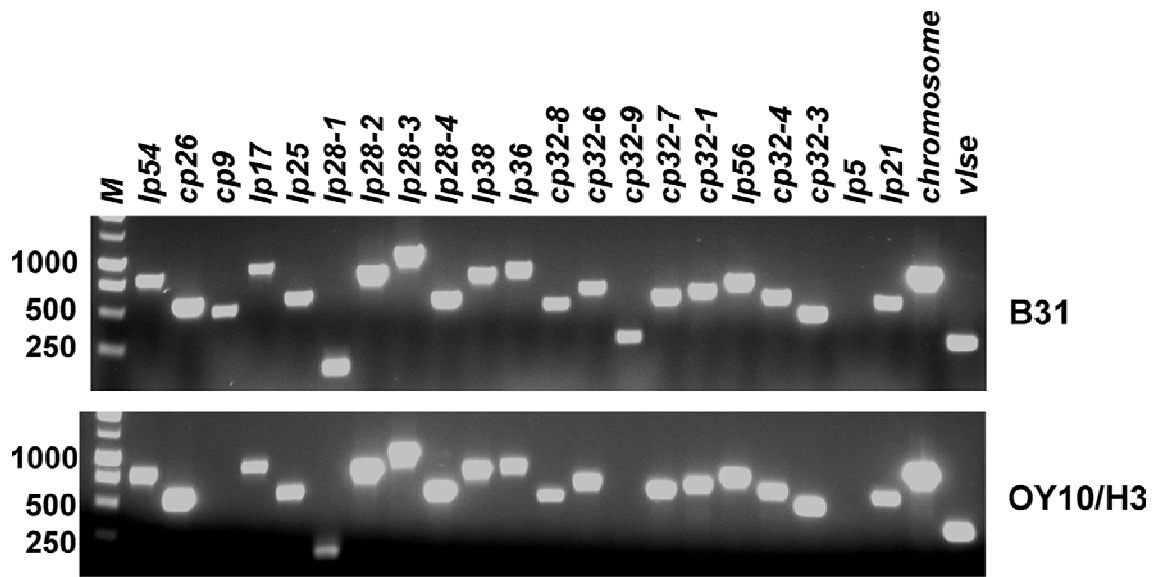

49

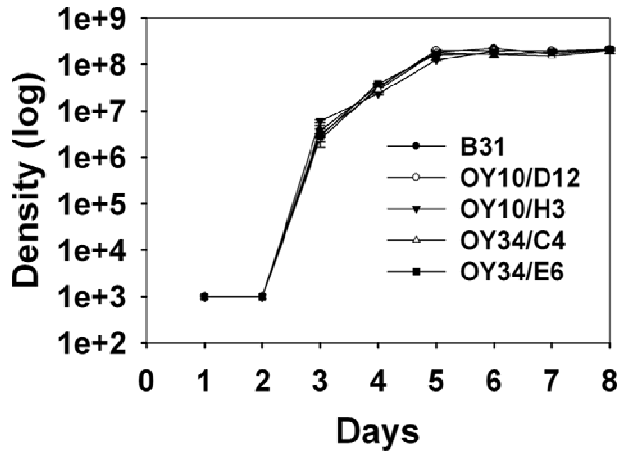

50

**WT**

***bosR***

***bosR*<sup>-/+</sup>**

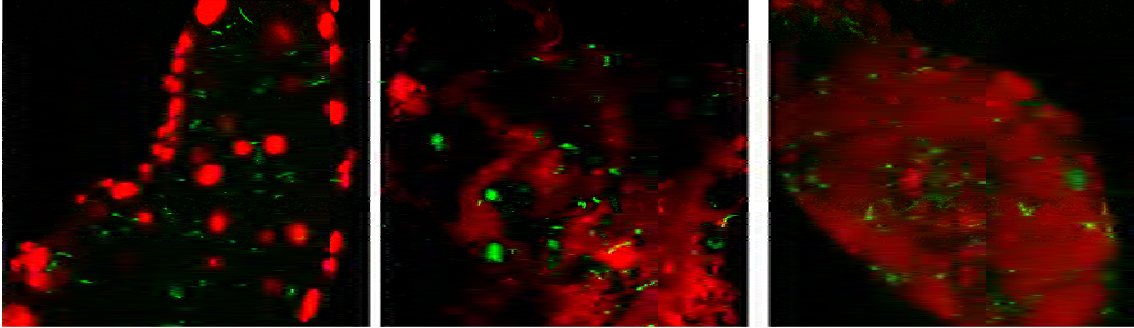

53

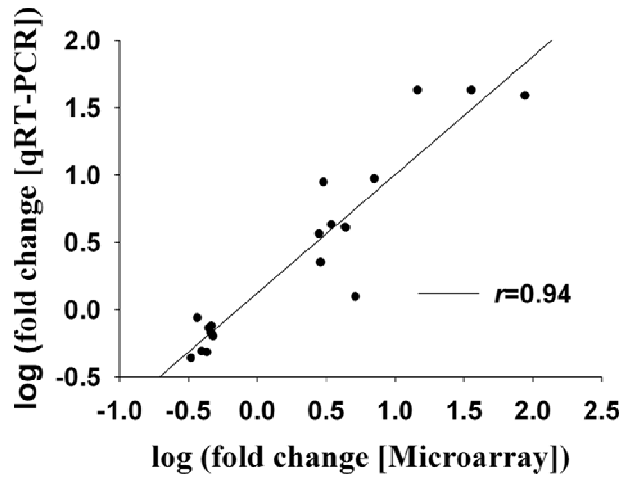

54



55

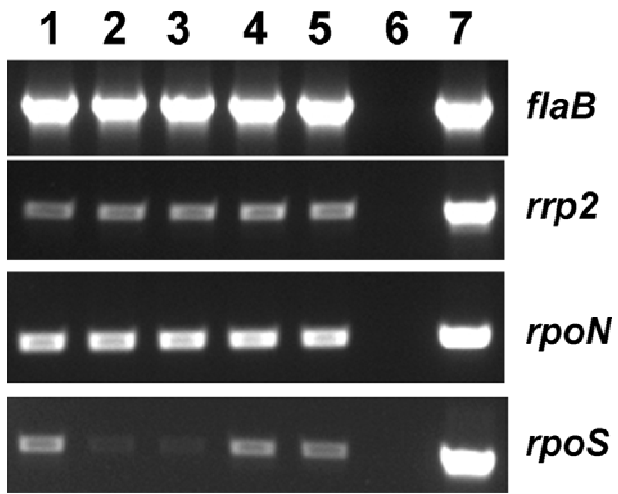

56

57 **Table S1.** Oligonucleotide primers used in this study  
58

| <b>Primer</b>    | <b>Sequence (5'-3')</b>                        |
|------------------|------------------------------------------------|
| ZM22.2F          | GGCATGGGTTATTATTGGGCTTGGTGGTGC                 |
| ZM22R            | GGCGCGCCGTCCCAGATGAGAACAAGGAAATCAC             |
| ZM23F            | GGCGCGCC CGGAATGTACGTCTATTATGTTGTCG            |
| ZM23R            | TTAG <u>CGCGCA</u> AAGGA ACTTACAGTGGAAGCCCTCAT |
| ZM24F, a1        | AGCCTCATCAATGTCTCTCAGCCA                       |
| ZM24R, ZM49F, b1 | GTCGGCATTACAAACGATCCTG                         |
| ZM25F, b4        | CGGAATTCATGAACGACAACATAATAGACGTA               |
| ZM25.2F, c1      | AT <u>GGATCC</u> GGGTTCTTATAACACAGTTAAGATCCAAG |
| ZM25R, b3        | AT <u>GGATCC</u> TATAAAGTGATTCCTTGTTCTCAT      |
| ZM26F            | AT <u>GGATCC</u> ATGAACGACAACATAATAGACGTA      |
| ZM26R            | CGGAATTCATATAAAGTGATTCCTTGTTCTCAT              |
| ZM49R            | AGTGAGCTATTGTGGAAGCCAAGC                       |
| ZM82             | GC <u>ACCCGGG</u> TCATAAAGTGATTCCTTGTTCTCAT    |
| ZM83             | AT <u>ACCCGGG</u> AACTTCAATAAGAGTTGATCCACCG    |
| bbb19-489F       | TGGTACTAAA ACTAAAGGTGCTGAAGAA                  |
| bbb19-571R       | GCATCTCTTTAGCTGCTTTTGACA                       |
| BB0771F          | CTGGACAAAGAAATAGAGGGATCTG                      |
| BB0771R          | CAAGGGTAATTCAGGGTTAAAAGAA                      |
| BBA24F           | ACGAAGCGCTAAAGACATTACAGA                       |
| BBA24R           | GGCATCAAAATTTACGCCCTTA                         |
| BBA62F           | TTATTTGTTGCTTGCGAAACTACAA                      |

---

|              |                             |
|--------------|-----------------------------|
| BBA62R       | TCATTGGAGCTGTAACCTTTTGAATCT |
| bb0032-1103F | TCTCAGCAATAGAATACGCCAACT    |
| bb0032-1182R | TTCTTGTGATATAGGCAGTCTTGCTT  |
| bb0104-541F  | GCAGTGGGCAGCCCTTT           |
| bb0104-610R  | CAGAACGTTGCAATCCACTTACA     |
| bb0153-385F  | GGTTGGGCATGGTTAGTATTGTG     |
| bb0153-455R  | GGACTATCCTGATTAGGCATTGAAA   |
| bb0401-476F  | GAGAACTGATGCTAAGCGCATCCA    |
| bb0401-583R  | AGTTTGCAGCGTAATTTGCTGTT     |
| bb0565-360F  | TCCATTTAGTATTGATGATGCTCCTAA |
| bb0565-434R  | CTCTTGCCAATTCCTGAAATAAATTT  |
| bb0646-870F  | TCTTGAAAATTCACACGCTCACTT    |
| bb0646-933R  | TGTGTTTTGGGCGCTTTTG         |
| bb0690-387F  | TGCTGGTGATTATGGTACTGCTAATAT |
| bb0690-471R  | AAGCAATGCCTTATGCATCCA       |
| bb0763-238F  | ACAGCCCACGGAACAGTTG         |
| bb0763-299R  | AAAAAATCATAAGCACCCCTCTCTCA  |
| bba48-400F   | ATCACAAACAGCAAGCCTTCAG      |
| bba48-467R   | AACAAAGACTCAAACCAGGCTCTA    |
| bbe31-432F   | TGGAAGAACTTTTGATACAGCGATT   |
| bbe31-569R   | ATGTCTGATACGATTGATTTTCATGGA |
| bbf01-180F   | CCAAAAGGAATTAGAAATTACGGAAA  |
| bbf01-251R   | GCATGTTGTGCTACTTGTGAAAGTT   |

---

---

|            |                           |
|------------|---------------------------|
| bbg27-87F  | ACTCGAAAGTGCAGCATGTTTC    |
| bbg27-167R | AAGGGCACGGCAATTCTG        |
| bbj26-137F | GCGGCAAGACAACCTTAATGAA    |
| bbj26-218R | AAAAGAGTTGAGTTGAAGCGGATCT |
| bbo39-515F | GTGGTGTGGAGTGCAAGCTT      |
| bbo39-588R | ACTGCCGCCATTAGAATAACTTACA |
| bbr41-362F | GAAAGACCGTACCCCAAATGG     |
| bbr41-424R | CAACTAAAGCGCACCTTCTGAA    |

---

59  
60  
61  
62

All primers were designed based on B31-MI sequence data. Restriction enzymes sites were underlined.

**Table S2.** *B. burgdorferi* genes down-regulated in the *bosR* mutant

| Gene ID | Function                                                               | Gene         | Replicon   | Ratio,<br>WT/mutant | P-value  |
|---------|------------------------------------------------------------------------|--------------|------------|---------------------|----------|
| BBA37   | hypothetical protein                                                   |              | lp54       | 116.74              | 1.50E-05 |
| BBB19   | outer surface protein C                                                | <i>ospC</i>  | cp26       | 87.76               | 2.20E-05 |
| BB0844  | hypothetical protein                                                   |              | chromosome | 39.12               | 9.00E-06 |
| BBA72   | hypothetical protein                                                   |              | lp54       | 37.89               | 5.00E-06 |
| BBA25   | decorin binding protein B                                              | <i>dbpB</i>  | lp54       | 36.87               | 3.40E-05 |
| BBG27   | conserved hypothetical protein                                         |              | lp28-2     | 35.84               | 4.79E-03 |
| BBA71   | hypothetical protein                                                   |              | lp54       | 28.99               | 4.60E-05 |
| BBG26   | hypothetical protein                                                   |              | lp28-2     | 27.94               | 1.36E-04 |
| BBA05   | antigen, S1                                                            |              | lp54       | 22.53               | 2.90E-05 |
| BBA26   | hypothetical protein                                                   |              | lp54       | 19.76               | 3.20E-05 |
| BBA36   | lipoprotein                                                            |              | lp54       | 17.23               | 4.30E-05 |
| BBD24   | hypothetical protein                                                   |              | lp17       | 15.66               | 2.40E-03 |
| BBA34   | oligopeptide ABC transporter, periplasmic oligopeptide-binding protein | <i>oppAV</i> | lp54       | 15.31               | 5.69E-03 |
| BBA24   | decorin binding protein A                                              | <i>dbpA</i>  | lp54       | 14.54               | 1.20E-04 |
| BBK32   | immunogenic protein P35                                                |              | lp36       | 13.87               | 3.45E-04 |
| BBM27   | rev protein                                                            | <i>rev</i>   | cp32-6     | 13.67               | 3.10E-05 |
| BBA66   | antigen, P35, putative                                                 |              | lp54       | 13.07               | 1.59E-04 |
| BBA06   | hypothetical protein                                                   |              | lp54       | 12.76               | 5.61E-03 |
| BBP27   | rev protein                                                            | <i>rev</i>   | cp32-1     | 12.51               | 4.90E-05 |
| BBA07   | chpAI protein, putative                                                |              | lp54       | 11.45               | 1.14E-03 |
| BBG24   | hypothetical protein                                                   |              | lp28-2     | 10.39               | 1.71E-04 |
| BBG23   | hypothetical protein                                                   |              | lp28-2     | 10.06               | 7.03E-03 |
| BBJ01   | hypothetical protein                                                   |              | lp38       | 9.60                | 2.86E-04 |
| BBM28   | lipoprotein                                                            | <i>lp</i>    | cp32-6     | 9.58                | 1.53E-04 |
| BBJ001  | conserved hypothetical protein, pseudogene                             |              | lp38       | 9.55                | 8.00E-06 |
| BBQ02   | hypothetical protein                                                   |              | lp56       | 7.64                | 6.76E-03 |

|         |                                                                   |               |            |      |          |
|---------|-------------------------------------------------------------------|---------------|------------|------|----------|
| BBK07   | hypothetical protein                                              |               | lp36       | 7.49 | 1.64E-04 |
| BBK52.1 | conserved hypothetical protein, pseudogene {Borrelia burgdorferi} |               | lp36       | 7.47 | 4.77E-03 |
| BBO39   | erpL protein                                                      | <i>erpL</i>   | cp32-7     | 7.04 | 5.50E-05 |
| BBA65   | hypothetical protein                                              |               | lp54       | 6.65 | 8.88E-04 |
| BBQ37   | conserved hypothetical protein                                    |               | lp56       | 5.64 | 2.15E-03 |
| BBL29   | conserved hypothetical protein                                    |               | cp32-8     | 5.59 | 5.02E-04 |
| BBA64   | antigen, P35                                                      |               | lp54       | 5.55 | 2.08E-04 |
| BBD19   | hypothetical protein                                              |               | lp17       | 5.35 | 2.52E-04 |
| BBA48   | hypothetical protein                                              |               | lp54       | 5.14 | 1.54E-03 |
| BBP28   | lipoprotein                                                       |               | cp32-1     | 5.05 | 4.00E-05 |
| BBF14.1 | hypothetical protein, paralogous family 65, authentic frameshift  |               | lp28-1     | 4.59 | 7.68E-04 |
| BBI31   | conserved hypothetical protein                                    |               | lp28-4     | 4.53 | 1.41E-03 |
| BBE31   | antigen, P35, putative                                            |               | lp25       | 4.37 | 2.89E-04 |
| BBS31   | conserved hypothetical protein                                    |               | cp32-3     | 4.33 | 3.85E-04 |
| BBJ26   | ABC transporter, ATP-binding protein                              |               | lp38       | 4.32 | 1.09E-04 |
| BBJ25   | hypothetical protein                                              |               | lp38       | 4.28 | 1.48E-04 |
| BBS41   | outer surface protein G                                           | <i>erpG</i>   | cp32-3     | 4.22 | 3.00E-05 |
| BB0404  | hypothetical protein                                              |               | chromosome | 4.21 | 9.97E-04 |
| BBK05   | hypothetical protein                                              |               | lp36       | 4.13 | 1.30E-03 |
| BBI42   | outer membrane protein, putative                                  |               | lp28-4     | 4.13 | 1.00E-04 |
| BBQ47   | erpX protein                                                      | <i>erpX</i>   | lp56       | 4.12 | 4.00E-05 |
| BBH41   | conserved hypothetical protein                                    |               | lp28-3     | 4.10 | 1.28E-02 |
| BBA33   | hypothetical protein                                              |               | lp54       | 4.08 | 2.16E-04 |
| BBD20   | transposase-like protein, authentic frameshift                    |               | lp17       | 4.07 | 1.90E-04 |
| BB0567  | chemotaxis histidine kinase                                       | <i>cheA-1</i> | chromosome | 4.02 | 4.81E-04 |
| BB0689  | hypothetical protein                                              |               | chromosome | 3.97 | 2.80E-05 |
| BBK33   | hypothetical protein                                              |               | lp36       | 3.95 | 7.63E-04 |
| BBR44   | hypothetical protein                                              |               | cp32-4     | 3.83 | 5.27E-04 |
| BB0846  | hypothetical protein                                              |               | chromosome | 3.67 | 8.70E-05 |
| BBJ24   | hypothetical protein                                              |               | lp38       | 3.64 | 1.49E-03 |

|          |                                            |               |            |      |          |
|----------|--------------------------------------------|---------------|------------|------|----------|
| BBD05    | hypothetical protein, paralogous family 84 |               | lp17       | 3.58 | 8.27E-03 |
| BBM29    | conserved hypothetical protein             |               | cp32-6     | 3.57 | 2.98E-03 |
| BB0848.1 | hypothetical protein, pseudogene           |               | chromosome | 3.55 | 5.26E-03 |
| BBK53    | outer membrane protein                     |               | lp36       | 3.49 | 2.90E-05 |
| BB0565   | purine-binding chemotaxis protein          | <i>cheW-2</i> | chromosome | 3.46 | 4.32E-04 |
| BB0563   | hypothetical protein                       |               | chromosome | 3.42 | 1.76E-04 |
| BBL39    | erpA protein                               | <i>erpA</i>   | cp32-8     | 3.42 | 3.80E-05 |
| BBJ02    | hypothetical protein                       |               | lp38       | 3.41 | 4.35E-04 |
| BBH01    | conserved hypothetical protein             |               | lp28-3     | 3.41 | 2.12E-03 |
| BB0671   | chemotaxis operon protein                  | <i>cheX</i>   | chromosome | 3.29 | 2.00E-06 |
| BBR40    | erpH protein                               | <i>erpH</i>   | cp32-4     | 3.20 | 5.76E-04 |
| BBJ23    | hypothetical protein                       |               | lp38       | 3.19 | 4.41E-04 |
| BB0566   | hypothetical protein                       |               | chromosome | 3.17 | 1.14E-04 |
| BBS42    | associated protein A                       | <i>bapA</i>   | cp32-3     | 3.14 | 1.68E-03 |
| BBM35    | conserved hypothetical protein             |               | cp32-6     | 3.14 | 8.20E-05 |
| BBQ03    | outer membrane protein, putative           |               | lp56       | 3.12 | 2.20E-05 |
| BBG25    | conserved hypothetical protein             |               | lp28-2     | 3.12 | 2.10E-03 |
| BBR29    | conserved hypothetical protein             |               | cp32-4     | 3.08 | 1.22E-04 |
| BBQ43    | conserved hypothetical protein             |               | lp56       | 3.08 | 1.05E-04 |
| BBA01    | conserved hypothetical protein             |               | lp54       | 3.08 | 6.00E-06 |
| BBR36    | conserved hypothetical protein             |               | cp32-4     | 3.03 | 4.36E-04 |
| BBF01    | erpD protein, putative                     |               | lp28-1     | 3.02 | 1.40E-03 |
| BBS38    | conserved hypothetical protein             |               | cp32-3     | 3.01 | 2.06E-04 |
| BB0680   | methyl-accepting chemotaxis protein        | <i>mcp-4</i>  | chromosome | 2.99 | 1.48E-03 |
| BBA35    | hypothetical protein                       |               | lp54       | 2.98 | 1.94E-04 |
| BB0681   | methyl-accepting chemotaxis protein        | <i>mcp-5</i>  | chromosome | 2.96 | 2.76E-03 |
| BB0670   | purine-binding chemotaxis protein          | <i>cheW-3</i> | chromosome | 2.90 | 3.41E-04 |
| BBR41    | conserved hypothetical protein             |               | cp32-4     | 2.87 | 3.33E-04 |
| BBG16    | hypothetical protein                       |               | lp28-2     | 2.85 | 4.90E-05 |
| BB0040   | chemotaxis protein methyltransferase       | <i>cheR-1</i> | chromosome | 2.84 | 1.80E-03 |
| BB0771   | RNA polymerase sigma factor                | <i>rpoS</i>   | chromosome | 2.81 | 1.56E-02 |

|         |                                                                     |              |            |      |          |
|---------|---------------------------------------------------------------------|--------------|------------|------|----------|
| BBL36   | conserved hypothetical protein                                      |              | cp32-8     | 2.80 | 3.28E-04 |
| BBM36   | conserved hypothetical protein                                      |              | cp32-6     | 2.80 | 3.30E-05 |
| BB0588  | 5-methylthioadenosine/S-adenosylhomocysteine nucleosidase, putative | <i>pfs-2</i> | chromosome | 2.77 | 5.38E-04 |
| BBQ44   | conserved hypothetical protein                                      |              | lp56       | 2.77 | 2.00E-06 |
| BBG17   | hypothetical protein                                                |              | lp28-2     | 2.76 | 1.50E-05 |
| BBH10   | hypothetical protein                                                |              | lp28-3     | 2.74 | 3.76E-03 |
| BBH09.1 | conserved hypothetical protein, pseudogene                          |              | lp28-3     | 2.74 | 2.31E-04 |
| BBD001  | conserved hypothetical protein                                      |              | lp17       | 2.72 | 1.93E-03 |
| BBJ48   | hypothetical protein                                                |              | lp38       | 2.69 | 1.33E-03 |
| BBR37   | conserved hypothetical protein                                      |              | cp32-4     | 2.67 | 1.97E-04 |
| BBG19   | hypothetical protein                                                |              | lp28-2     | 2.64 | 3.26E-03 |
| BBA32   | hypothetical protein                                                |              | lp54       | 2.63 | 2.11E-03 |
| BBJ47   | hypothetical protein                                                |              | lp38       | 2.59 | 6.71E-03 |
| BB0555  | hypothetical protein                                                |              | chromosome | 2.59 | 4.58E-04 |
| BBO36   | conserved hypothetical protein                                      |              | cp32-7     | 2.56 | 4.34E-04 |
| BBG14   | hypothetical protein                                                |              | lp28-2     | 2.53 | 7.80E-05 |
| BBO37   | conserved hypothetical protein                                      |              | cp32-7     | 2.52 | 6.40E-05 |
| BB0442  | inner membrane protein                                              |              | chromosome | 2.52 | 4.96E-03 |
| BBL37   | conserved hypothetical protein                                      |              | cp32-8     | 2.51 | 3.10E-05 |
| BB0842  | ornithine carbamoyltransferase, catabolic                           | <i>arcB</i>  | chromosome | 2.50 | 2.68E-04 |
| BB0776  | hypothetical protein                                                |              | chromosome | 2.49 | 1.09E-02 |
| BBG18   | hypothetical protein                                                |              | lp28-2     | 2.48 | 6.37E-04 |
| BBG20   | hypothetical protein                                                |              | lp28-2     | 2.47 | 3.90E-04 |
| BBA49   | hypothetical protein                                                |              | lp54       | 2.44 | 1.29E-02 |
| BBO40   | erpM protein                                                        | <i>erpM</i>  | cp32-7     | 2.44 | 1.09E-03 |
| BBG31   | conserved hypothetical protein                                      |              | lp28-2     | 2.42 | 2.75E-04 |
| BBA04   | antigen, S2                                                         |              | lp54       | 2.41 | 9.61E-03 |
| BBG29   | conserved hypothetical protein                                      |              | lp28-2     | 2.40 | 6.47E-04 |
| BBG22   | hypothetical protein                                                |              | lp28-2     | 2.39 | 7.60E-05 |
| BB0343  | Glu-tRNA(Gln) amidotransferase, subunit C                           | <i>gatC</i>  | chromosome | 2.38 | 3.00E-03 |



|        |                                                      |               |            |      |          |
|--------|------------------------------------------------------|---------------|------------|------|----------|
| BB0344 | DNA helicase                                         | <i>uvrD</i>   | chromosome | 2.37 | 2.08E-04 |
| BBJ28  | hypothetical protein                                 |               | lp38       | 2.37 | 3.32E-03 |
| BBS39  | conserved hypothetical protein                       |               | cp32-3     | 2.36 | 4.80E-05 |
| BBQ63  | hypothetical protein, family 117 paralog, pseudogene |               | lp56       | 2.35 | 9.40E-04 |
| BBG30  | hypothetical protein                                 |               | lp28-2     | 2.30 | 3.13E-03 |
| BBK17  | adenine deaminase                                    | <i>adeC</i>   | lp36       | 2.28 | 2.90E-03 |
| BBO29  | hypothetical protein                                 |               | cp32-7     | 2.28 | 7.50E-05 |
| BB0777 | adenine phosphoribosyltransferase                    | <i>apt</i>    | chromosome | 2.27 | 2.64E-03 |
| BBO19  | conserved hypothetical protein                       |               | cp32-7     | 2.27 | 8.59E-03 |
| BBL42  | hypothetical protein                                 |               | cp32-8     | 2.26 | 1.64E-04 |
| BBR42  | outer surface protein F                              | <i>erpY</i>   | cp32-4     | 2.26 | 5.99E-04 |
| BBO43  | hypothetical protein                                 |               | cp32-7     | 2.25 | 4.00E-06 |
| BBP41  | hypothetical protein                                 |               | cp32-1     | 2.25 | 1.45E-04 |
| BB0672 | chemotaxis response regulator                        | <i>cheY-3</i> | chromosome | 2.22 | 2.90E-05 |
| BBS44  | hypothetical protein                                 |               | cp32-3     | 2.21 | 1.28E-04 |
| BBM41  | hypothetical protein                                 |               | cp32-6     | 2.19 | 4.00E-06 |
| BBR43  | hypothetical protein                                 |               | cp32-4     | 2.18 | 2.68E-03 |
| BB0562 | hypothetical protein                                 |               | chromosome | 2.18 | 1.07E-03 |
| BB0313 | cell division protein                                | <i>ftsJ</i>   | chromosome | 2.10 | 1.95E-04 |
| BB0554 | hypothetical protein                                 |               | chromosome | 2.10 | 7.20E-04 |

**Table S3.** *B. burgdorferi* genes up-regulated in the *bosR* mutant

| <b>Gene ID</b> | <b>Function</b>                                   | <b>Gene</b> | <b>Replicon</b> | <b>Ratio,<br/>Mutant/WT</b> | <b>P-value</b> |
|----------------|---------------------------------------------------|-------------|-----------------|-----------------------------|----------------|
| BBJ09          | outer surface protein D                           | <i>ospD</i> | lp38            | 3.13                        | 3.30E-05       |
| BB0646         | hydrolase, alpha/beta fold family                 |             | chromosome      | 3.03                        | 3.17E-04       |
| BBE25          | hypothetical protein                              |             | lp25            | 2.81                        | 5.21E-04       |
| BB0401         | glutamate transporter, putative                   |             | chromosome      | 2.72                        | 3.17E-02       |
| BBH26          | hypothetical protein                              |             | lp28-3          | 2.70                        | 6.25E-04       |
| BBH27          | conserved hypothetical protein                    |             | lp28-3          | 2.68                        | 5.56E-04       |
| BB0812         | pantothenate metabolism flavoprotein              | <i>dfp</i>  | chromosome      | 2.62                        | 1.77E-02       |
| BBJ39.1        | multidrug-efflux transporter, pseudogene          |             | lp38            | 2.60                        | 1.49E-02       |
| BB0032         | hypothetical protein                              |             | chromosome      | 2.53                        | 1.03E-02       |
| BB0212         | hypothetical protein                              |             | chromosome      | 2.48                        | 3.85E-04       |
| BB0028         | lipoprotein, putative                             |             | chromosome      | 2.48                        | 5.70E-05       |
| BB0335         | oligopeptide ABC transporter, ATP-binding protein | <i>oppF</i> | chromosome      | 2.48                        | 4.40E-05       |
| BB0075         | hypothetical protein                              |             | chromosome      | 2.47                        | 6.56E-04       |
| BBG02          | conserved hypothetical protein                    |             | lp28-2          | 2.44                        | 1.17E-03       |
| BB0076         | signal recognition particle-docking protein FtsY  | <i>ftsY</i> | chromosome      | 2.40                        | 5.80E-03       |
| BB0128         | cytidylate kinase                                 | <i>cmk</i>  | chromosome      | 2.40                        | 3.44E-02       |
| BB0352         | hypothetical protein                              |             | chromosome      | 2.40                        | 1.09E-04       |
| BBG09          | conserved hypothetical protein                    |             | lp28-2          | 2.39                        | 1.80E-05       |
| BB0078         | hypothetical protein                              |             | chromosome      | 2.36                        | 6.53E-03       |
| BB0072         | hypothetical protein                              |             | chromosome      | 2.36                        | 2.00E-03       |
| BB0183         | conserved hypothetical protein                    |             | chromosome      | 2.35                        | 1.01E-02       |
| BBG34          | hypothetical protein                              |             | lp28-2          | 2.35                        | 4.98E-03       |
| BBU05          | plasmid partition protein, putative               |             | lp21            | 2.34                        | 2.52E-03       |
| BBA62          | lipoprotein                                       |             | lp54            | 2.33                        | 1.34E-03       |
| BBM32          | plasmid partition protein, putative               |             | cp32-6          | 2.31                        | 2.55E-03       |
| BB0360         | hypothetical protein                              |             | chromosome      | 2.31                        | 5.35E-04       |

|        |                                                  |               |            |      |          |
|--------|--------------------------------------------------|---------------|------------|------|----------|
| BBM33  | conserved hypothetical protein                   |               | cp32-6     | 2.30 | 1.58E-03 |
| BB0730 | glucose-6-phosphate isomerase                    | <i>pgi</i>    | chromosome | 2.29 | 1.32E-03 |
| BB0249 | phosphatidyltransferase                          |               | chromosome | 2.29 | 1.06E-02 |
| BB0071 | hypothetical protein                             |               | chromosome | 2.27 | 6.81E-04 |
| BBH28  | plasmid partition protein, putative              |               | lp28-3     | 2.27 | 4.23E-04 |
| BB0363 | periplasmic protein                              |               | chromosome | 2.26 | 4.11E-04 |
| BB0228 | conserved hypothetical protein                   |               | chromosome | 2.25 | 1.36E-03 |
| BB0153 | superoxide dismutase                             | <i>sodA</i>   | chromosome | 2.25 | 1.23E-03 |
| BB0024 | hypothetical protein                             |               | chromosome | 2.24 | 7.25E-04 |
| BB0184 | carbon storage regulator                         | <i>csrA</i>   | chromosome | 2.24 | 8.51E-04 |
| BB0539 | conserved hypothetical integral membrane protein |               | chromosome | 2.24 | 4.20E-05 |
| BBJ41  | antigen, P35, putative                           |               | lp38       | 2.24 | 9.20E-04 |
| BB0362 | prolipoprotein diacylglycerol transferase        | <i>lgt</i>    | chromosome | 2.23 | 1.00E-05 |
| BB0540 | translation elongation factor G                  | <i>fus-1</i>  | chromosome | 2.23 | 2.43E-03 |
| BB0034 | hypothetical protein                             |               | chromosome | 2.22 | 1.30E-03 |
| BB0314 | octaprenyl-diphosphate synthase                  | <i>ispB</i>   | chromosome | 2.22 | 1.12E-03 |
| BBI36  | antigen, P35, putative                           |               | lp28-4     | 2.22 | 1.55E-03 |
| BBI38  | hypothetical protein                             |               | lp28-4     | 2.22 | 4.34E-04 |
| BB0073 | hypothetical protein                             |               | chromosome | 2.21 | 2.50E-05 |
| BBA74  | outer membrane porin                             | <i>oms28</i>  | lp54       | 2.19 | 2.54E-03 |
| BB0840 | lipoprotein, putative                            |               | chromosome | 2.19 | 4.13E-04 |
| BBG06  | conserved hypothetical protein                   |               | lp28-2     | 2.19 | 4.80E-05 |
| BBI39  | hypothetical protein                             |               | lp28-4     | 2.19 | 8.00E-06 |
| BB0104 | periplasmic serine protease DO                   | <i>htrA</i>   | chromosome | 2.18 | 3.56E-03 |
| BB0152 | glucosamine-6-phosphate isomerase                | <i>nagB</i>   | chromosome | 2.18 | 2.62E-03 |
| BB0763 | response regulatory protein                      | <i>rrp-2</i>  | chromosome | 2.16 | 1.17E-03 |
| BBH37  | hypothetical protein                             |               | lp28-3     | 2.16 | 7.40E-05 |
| BB0240 | glycerol uptake facilitator                      | <i>glpF</i>   | chromosome | 2.15 | 1.92E-03 |
| BBH29  | conserved hypothetical protein                   |               | lp28-3     | 2.13 | 1.61E-04 |
| BB0030 | signal peptidase I                               | <i>lepB-1</i> | chromosome | 2.12 | 8.86E-04 |

|        |                                                |               |            |      |          |
|--------|------------------------------------------------|---------------|------------|------|----------|
| BB0011 | hypothetical protein                           |               | chromosome | 2.12 | 3.50E-05 |
| BBJ19  | conserved hypothetical protein                 |               | lp38       | 2.11 | 1.21E-03 |
| BB0333 | oligopeptide ABC transporter, permease protein | <i>oppC-1</i> | chromosome | 2.11 | 4.74E-04 |
| BB0690 | neutrophil activating protein                  | <i>napA</i>   | chromosome | 2.11 | 1.07E-04 |
| BB0193 | lipoprotein, putative                          |               | chromosome | 2.09 | 3.22E-04 |
| BB0770 | conserved hypothetical protein                 |               | chromosome | 2.09 | 7.61E-04 |
